# Supplementary material for: The A-center defect in diamond: quantum mechanical characterization through the infrared spectrum
Source: Royal Society of Chemistry journal article supplement (doi:10.1039/c7cp00093f), 2017-01-01
Supplement: c7cp00093f1.pdf [file c7cp00093f1.pdf]

## The A-center Defect in Diamond. A Quantum Mechanical Characterization Through the Infrared Spectrum Supplemental Material

S. Salustro,<sup>1</sup> G. Sansone,<sup>1</sup> C. M. Zicovich-Wilson,<sup>2</sup> Yves Noël,<sup>3</sup> L. Maschio,<sup>1</sup> and R. Dovesi<sup>1</sup>

<sup>1</sup>Dipartimento di Chimica, Università di Torino and NIS - Nanostructured Interfaces and Surfaces - Centre of Excellence, Via Giuria 5, 10125 Torino, Italy

<sup>2</sup>Centro de Investigación en Ciencias-(IICBA), Universidad Autónoma del Estado de Morelos, Av. Universidad, 1001, Col. Chamilpa, 62209 Cuernavaca, Morelos (Mexico)

<sup>3</sup>Institut des Sciences de la Terre de Paris (UMR 7193 UPMC-CNRS), UPMC, Sorbonne Universités, Paris, France

### I. IR SPECTRA

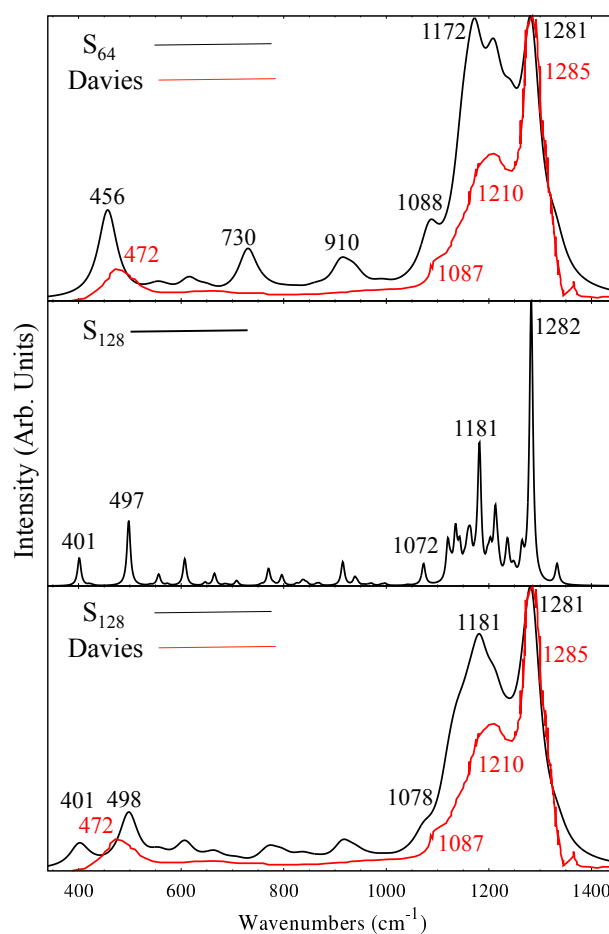

Figure S1: Simulated and experimental IR spectra of the A-center defect in diamond. In the top panel the  $S_{64}$  spectrum, computed with a  $\text{FWHM}=45 \text{ cm}^{-1}$  is compared with the experimental spectrum reported in Ref. 2 of the manuscript. In the middle panel the simulated IR spectrum of the  $S_{128}$  with a  $\text{FWHM}=8 \text{ cm}^{-1}$  is shown. Finally, in the bottom panel, the comparison with the experimental spectrum and the  $S_{128}$  with a  $\text{FWHM}=45 \text{ cm}^{-1}$  is reported.
